# Supplementary material for: An inducible hACE2 transgenic mouse model recapitulates SARS-CoV-2 infection and pathogenesis in vivo
Source: PubMed Central journal article supplement — Proc Natl Acad Sci U S A. 2023 Jun 12;120(25):e2207210120. doi: 10.1073/pnas.2207210120 (PMC10288645; doi:10.1073/pnas.2207210120), 2023-06-12
Supplement: pnas.2207210120.sapp.pdf [file pnas.2207210120.sapp.pdf]

## Supporting Information for

**An inducible hACE2 transgenic mouse model recapitulates SARS-CoV-2 infection and pathogenesis *in vivo***

Kuo Liu, Muxue Tang, Wei Xu, Xinfeng Meng, Hengwei Jin, Maoying Han, Jing Pu, Yutang Li, Fanke Jiao, Ruilin Sun, Ruling Shen, Kathy O. Lui, Lu Lu\*, Bin Zhou\*

\*Corresponding authors: Lu Lu, Bin Zhou.

Email: [lul@fudan.edu.cn](mailto:lul@fudan.edu.cn) (L.L.), [zhoubin@sibs.ac.cn](mailto:zhoubin@sibs.ac.cn) (B.Z.)

**This PDF file includes:**

Figures S1 to S4

**Fig. S1.**

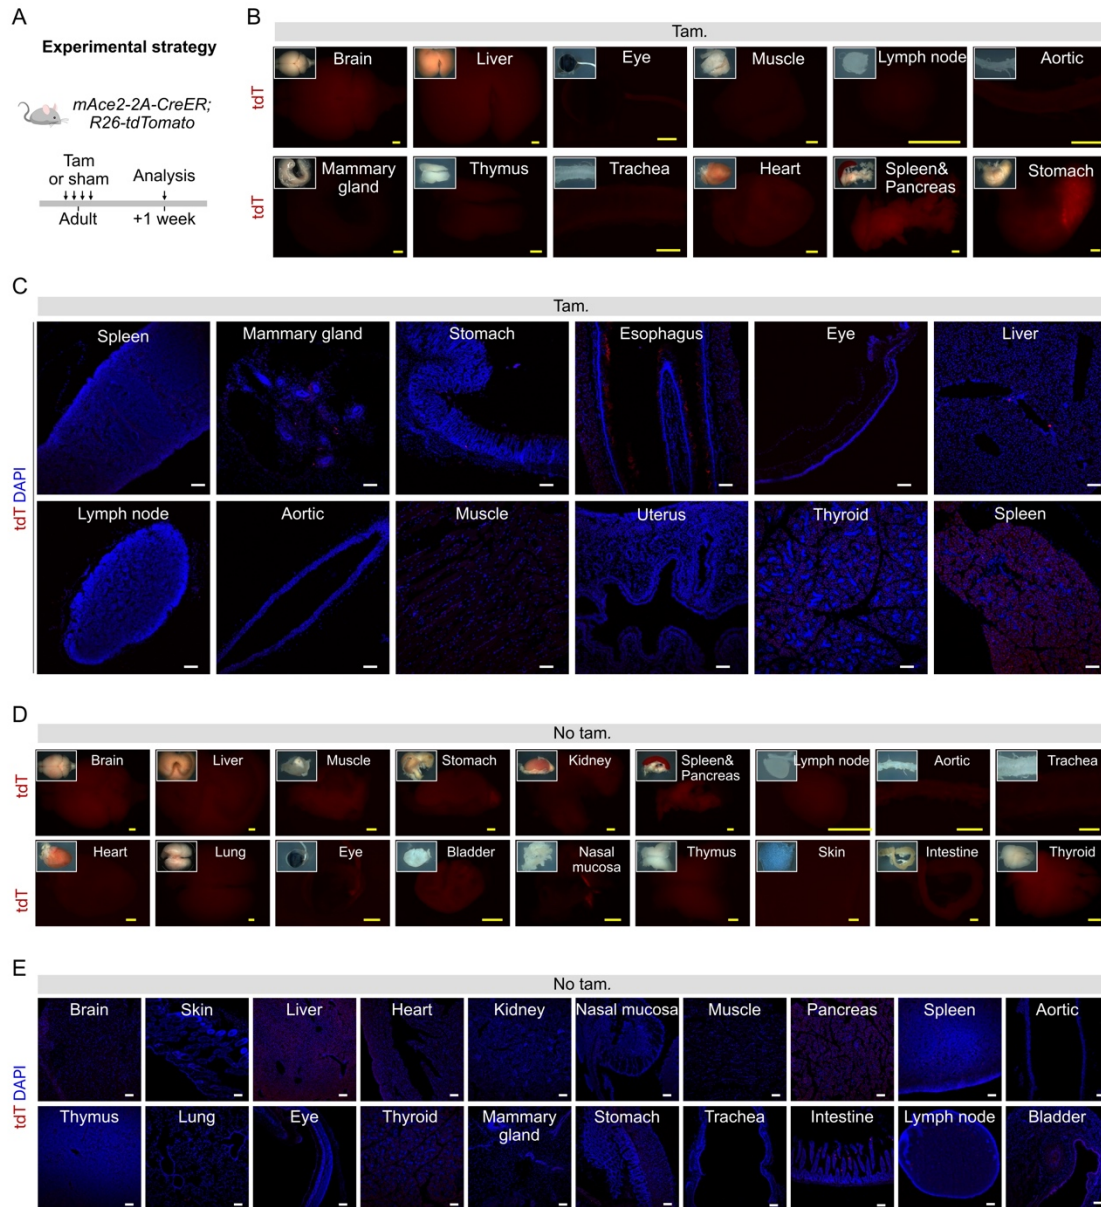

Figure S1

**Fig. S1.** Generation and characterization of *mAce2-2A-CreER* line. (A) A schematic diagram illustrating the experimental design. (B) Whole-mount fluorescent images of organs of *mAce2-2A-CreER;R26-tdTomato* mice after tamoxifen induction. (C) Immunostaining for tdTomato on tissue sections after tamoxifen treatment. (D) Whole-mount fluorescent images of organs without tamoxifen treatment. (E) immunostaining for tdTomato on tissue sections without tamoxifen treatment. Scale bars, yellow, 1 mm; white, 100  $\mu$ m.

**Fig. S2.**

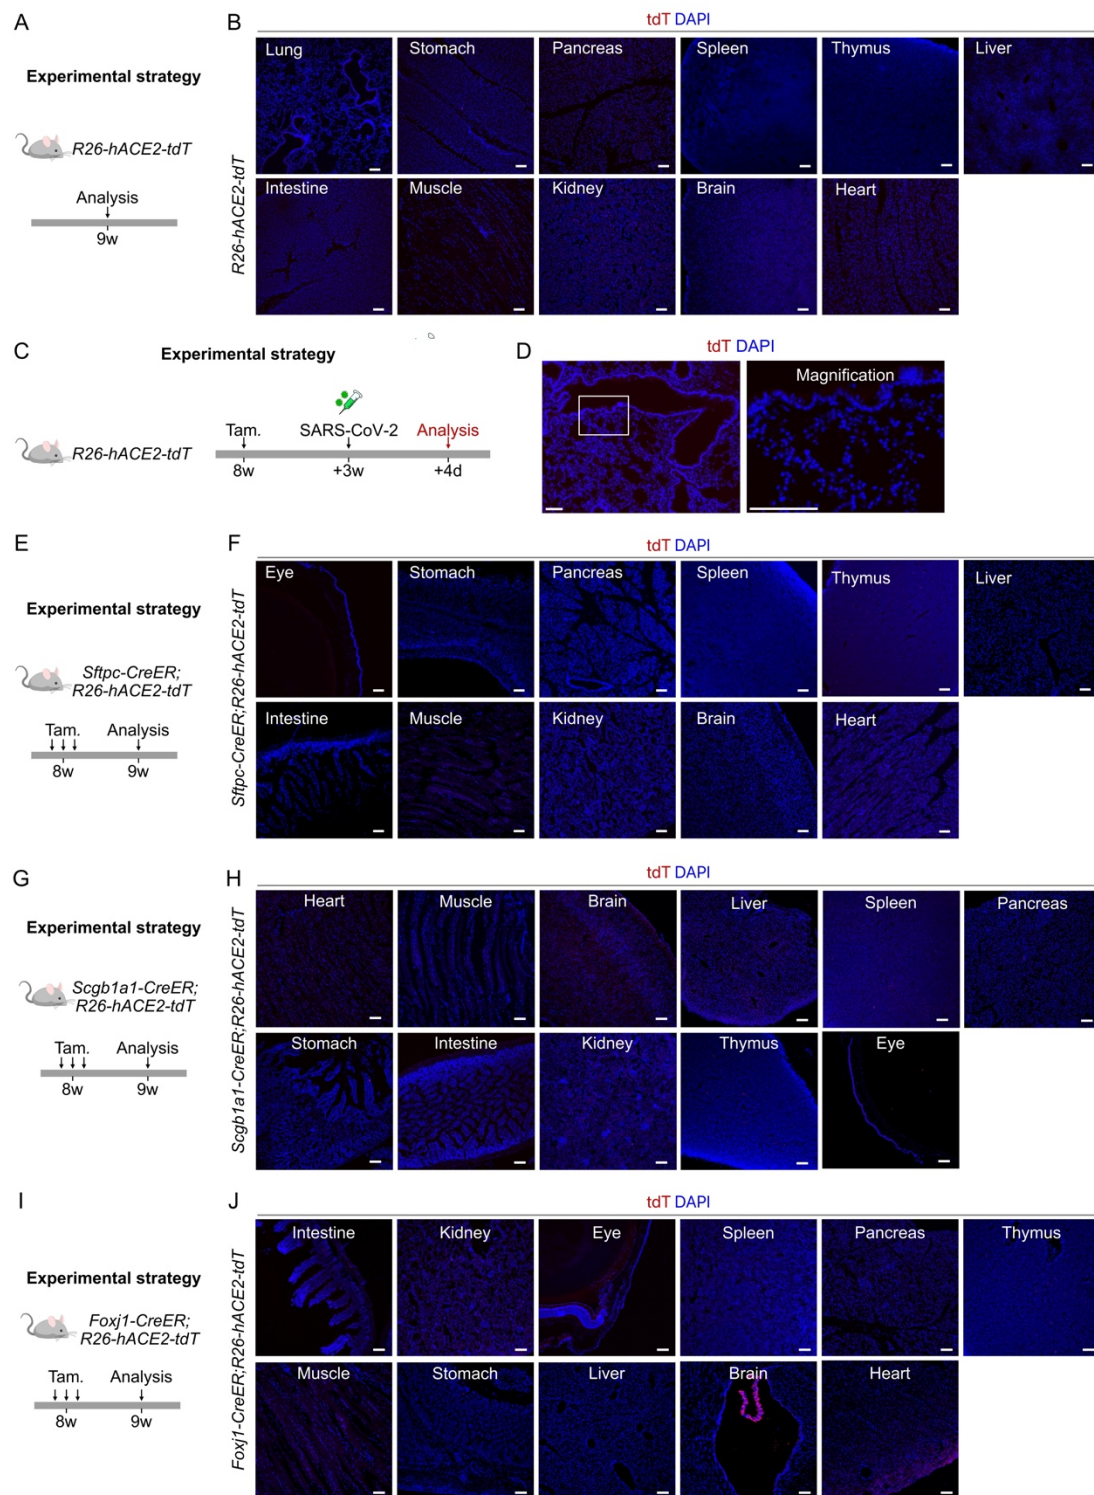

Figure S2

**Fig. S2.** Characterization of *R26-hACE2-tdT* line. (A and B) A schematic diagram illustrating the experimental design (A) and immunostaining for tdTomato on tissues sections of *R26-hACE2-tdT*

mice (B). (C) A schematic diagram illustrating the virus infection strategy. (D) Immunostaining for tdT on infected lung sections of *R26-hACE2-tdT*. (E and F) A schematic diagram illustrating the experimental design (E) and immunostaining for tdTomato on tissues sections of *Sftpc-CreER;R26-hACE2-tdT* mice after tamoxifen treatment (F). (G and H) A schematic diagram illustrating the experimental design (G) and immunostaining for tdTomato on tissues sections of *Scgb1a1-CreER;R26-hACE2-tdT* mice after tamoxifen treatment (H). (I and J) A schematic diagram illustrating the experimental design (I) and immunostaining for tdTomato on tissues sections of *Foxj1-CreER;R26-hACE2-tdT* mice after tamoxifen treatment (J). Scale bars, 100  $\mu$ m.

**Fig. S3.**

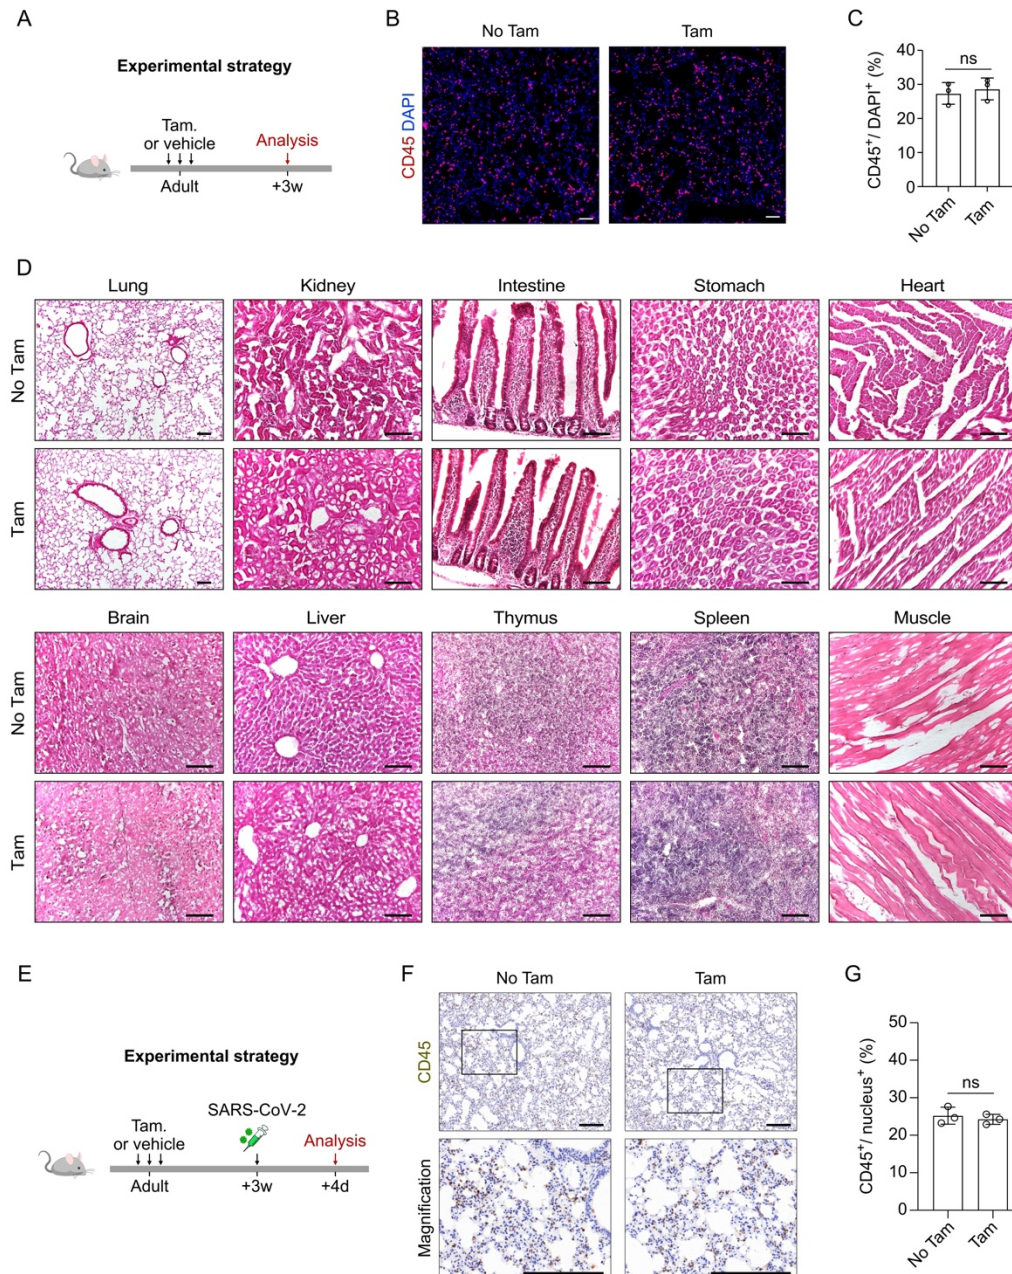

Figure S3

**Fig. S3.** No significant toxicity and immune effects were induced by tamoxifen treatment. (A) A schematic diagram illustrating the experimental strategy. The lungs were collected 3 weeks post tamoxifen or corn oil (vehicle) treatment. (B) Immunostaining for CD45 on lung sections in (A). (C) Quantification of percentage of CD45<sup>+</sup> cells in DAPI<sup>+</sup> cells in (B). *P* value was calculated by unpaired two-tailed Student's *t*-test. ns, no significance. Data are the mean  $\pm$  SD; *n* = 3. (D) H&E staining of the tissues sections post 3 weeks tamoxifen or corn oil (vehicle) treatment. (E) A

schematic diagram illustrating the experimental strategy. (F) IHC staining for CD45<sup>+</sup> immune cells on lung sections in (E). (G) Quantification of percentage of CD45<sup>+</sup> cells in nucleus<sup>+</sup> cells in (F). *P* value was calculated by unpaired two-tailed Student's *t*-test. ns, no significance. Data are the mean  $\pm$  SD; n = 3. Scale bars, white, 100  $\mu$ m. black, 200  $\mu$ m.

**Fig. S4.**

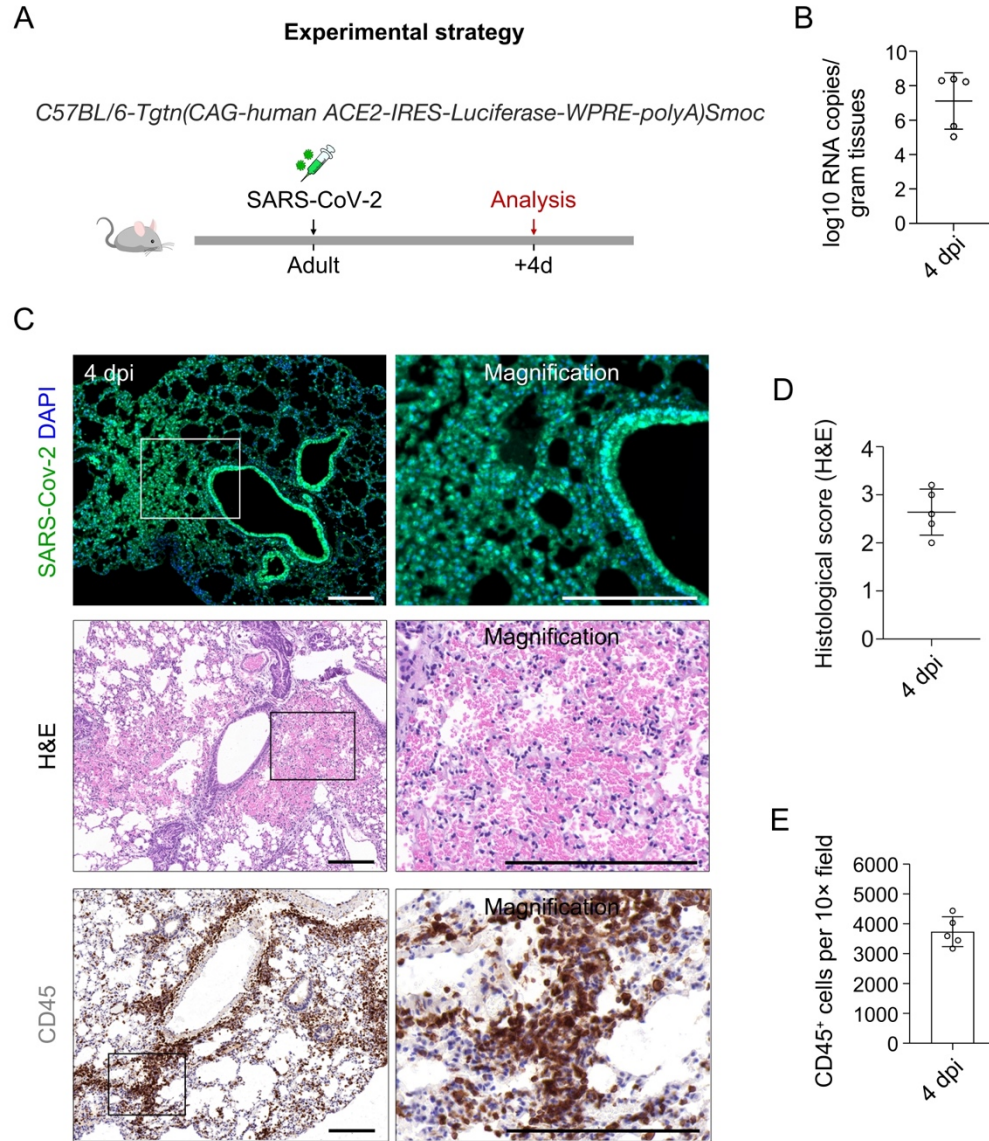

**Figure S4**

**Fig. S4.** Pathological changes on a CAG promoter driven hACE2 mice after SARS-CoV-2 infection. (A) A schematic diagram illustrating the experimental design. (B) RTq-PCR quantification of SARS-CoV-2 ORF gene expression in the lungs at 4 dpi. Data are presented as mean  $\pm$  SD; n = 5 mice per group. (C) Immunostaining for SARS-CoV-2 S protein on lung sections at 4 dpi (up panel). H&E staining of the infected lung tissues at 4 dpi (middle panel). IHC staining for CD45 on lung sections at 4 dpi (down panel). (D) H&E score of the lung injuries at at 4 dpi. N = 5 mice per group. (E) Quantification the cell number of CD45<sup>+</sup> immune cells of infected lung tissues. Data are presented as mean  $\pm$  SD; n = 5 mice per group. Scale bars, white, 100  $\mu$ m; black, 200  $\mu$ m.
